CORRECTION

# Correction: Ability to Generate Patient-Derived Breast Cancer Xenografts Is Enhanced in Chemoresistant Disease and Predicts Poor Patient Outcomes

Priscilla F. McAuliffe, Kurt W. Evans, Argun Akcakanat, Ken Chen, Xiaofeng Zheng, Hao Zhao, Agda Karina Eterovic, Takafumi Sangai, Ashley M. Holder, Chandeshwar Sharma, Huiqin Chen, Kim-Anh Do, Emily Tarco, Mihai Gagea, Katherine A. Naff, Aysegul Sahin, Asha S. Multani, Dalliah M. Black, Elizabeth A. Mittendorf, Isabelle Bedrosian, Gordon B. Mills, Ana Maria Gonzalez-Angulo, Funda Meric-Bernstam

[Table 1](#) appears incorrectly in the published article. Please see the correct [Table 1](#) and its legend below.

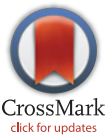

## OPEN ACCESS

**Citation:** McAuliffe PF, Evans KW, Akcakanat A, Chen K, Zheng X, Zhao H, et al. (2016) Correction: Ability to Generate Patient-Derived Breast Cancer Xenografts Is Enhanced in Chemoresistant Disease and Predicts Poor Patient Outcomes. PLoS ONE 11 (3): e0151121. doi:10.1371/journal.pone.0151121

**Published:** March 8, 2016

**Copyright:** © 2016 McAuliffe et al. This is an open access article distributed under the terms of the [Creative Commons Attribution License](#), which permits unrestricted use, distribution, and reproduction in any medium, provided the original author and source are credited.

**Table 1. Tumor characteristics and engraftment rate.**

|                       |                     | Implanted (N) | Passaged (N, %) | P Value |
|-----------------------|---------------------|---------------|-----------------|---------|
| Breast Cancer Subtype | TNBC                | 13            | 7 (53.8%)       | 0.02*   |
|                       | HER2+               | 3             | 1 (33.3%)       |         |
|                       | HR+                 | 32            | 5 (15.6%)       |         |
| NeoCT—Yes             | TNBC                | 9             | 5 (55.5%)       | 0.02**  |
|                       | HER2+               | 2             | 1 (50%)         |         |
|                       | HR+                 | 13            | 5 (38.5%)       |         |
| NeoCT—No              | TNBC                | 4             | 2 (50%)         |         |
|                       | HER2+               | 1             | 0 (0%)          |         |
|                       | HR+                 | 19            | 0 (0%)          |         |
| Response to NeoCT     | Progressive Disease | 7             | 6 (85.7%)       | 0.02*** |
|                       | Stable Disease      | 9             | 2 (22.2%)       |         |
|                       | Partial Response    | 8             | 3 (37.5%)       |         |

NeoCT: Neoadjuvant chemotherapy

\*P value by Fisher exact analysis, comparing BCX engraftment in TNBC to HR+ breast cancer.

\*\*P value by Fisher exact analysis, comparing BCX engraftment in NeoCT to no NeoCT implantations.

\*\*\*P value by Fisher exact analysis, comparing BCX engraftment in tumors that progressed on NeoCT vs. those that had stable disease/partial response.

doi:10.1371/journal.pone.0151121.t001

## Reference

1. McAuliffe PF, Evans KW, Akcakanat A, Chen K, Zheng X, Zhao H, et al. (2015) Ability to Generate Patient-Derived Breast Cancer Xenografts Is Enhanced in Chemoresistant Disease and Predicts Poor Patient Outcomes. PLoS ONE 10(9): e0136851. doi:[10.1371/journal.pone.0136851](https://doi.org/10.1371/journal.pone.0136851) PMID: [26325287](https://pubmed.ncbi.nlm.nih.gov/26325287/)
